# Supplementary material
Source: Springer Nature journal article supplement (https://www.springermedizin.de/resource/supplementary/12905_2008_149_MOESM6_ESM.pdf/9519260)
Supplement: MOESM6 [file 9519260]

TTTTCACTGATGTTGAAGGGCGGATTATATCGGGTTCCGGGCGGTGTTTCAA

61

73

85

97

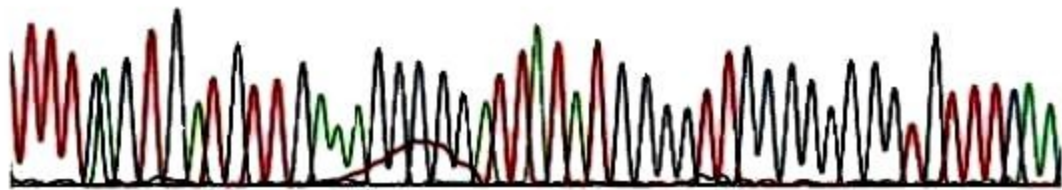

gi|48702|emb|X52364.1|NGOPAK N. gonorrhoeae opaK gene for opacity  
protein Length=1434

Score = 98.7 bits (51), Expect = 1e-18  
Identities = 51/51, (100%), Gaps = 0/51 (0%)  
Strand=Plus/Minus

|           |                                                     |     |
|-----------|-----------------------------------------------------|-----|
| Query 1   | TTTCACTGATGTTGAAGGGCGGATTATATCGGGTTCCGGGCGGTGTTTCAA | 51  |
|           |                                                     |     |
| Sbjct 425 | TTTCACTGATGTTGAAGGGCGGATTATATCGGGTTCCGGGCGGTGTTTCAA | 375 |
